# Supplementary material for: Discovery of Food-Derived Dipeptidyl Peptidase IV Inhibitory Peptides: A Review
Source: PubMed Central journal article supplement (PMC6387223; doi:10.3390/ijms20030463), 2019-01-22
Supplement: ijms-20-00463-s001.pdf [file ijms-20-00463-s001.pdf]

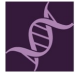

**Table 1.** IC<sub>50</sub>, molecular weight and GRAVY value of DPP-IV inhibitory peptides.

| Sequence      | IC <sub>50</sub> (μM) | References | Molecular Weight | GRAVY Value |
|---------------|-----------------------|------------|------------------|-------------|
| IPI           | 5                     | [1]        | 341.4509         | 2.467       |
| LPL           | 5                     | [1]        | 341.4509         | 2.000       |
| KVLP          | 5.3 *                 | [1]        | 455.5981         | 0.625       |
| LPVPQK        | 17.4 *                | [1]        | 680.8533         | -0.433      |
| VPLGTQ        | 22.8 *                | [1]        | 613.7119         | 0.300       |
| VPYPQ         | 26.1 *                | [1]        | 602.688          | -0.760      |
| IPA           | 28.3                  | [2]        | 299.3702         | 1.567       |
| IPIQY         | 35.2                  | [2]        | 632.7576         | 0.520       |
| WR            | 37.8                  | [2]        | 360.4161         | -2.700      |
| INNQLFPYPY    | 40.1                  | [2]        | 1268.449         | -0.520      |
| WK            | 40.6                  | [2]        | 332.4027         | -2.400      |
| GPGA          | 41.9                  | [2]        | 300.3163         | -0.150      |
| PLLQ          | 42.0 *                | [1]        | 469.5816         | 0.625       |
| LKPTPEGDLE    | 42                    | [2]        | 1098.227         | -1.110      |
| APA           | 43.3                  | [3]        | 257.2895         | 0.667       |
| ILAP          | 43.4                  | [2]        | 412.5343         | 2.125       |
| WL            | 43.6                  | [2]        | 317.388          | 1.450       |
| LPVPQ         | 43.8 *                | [1]        | 552.6783         | 0.260       |
| WP            | 44                    | [2]        | 301.3452         | -1.250      |
| IPAVF         | 44.7                  | [2]        | 545.6853         | 2.340       |
| LKPTPEGDDL    | 45                    | [2]        | 969.1113         | -0.844      |
| FPI           | 45.2                  | [3]        | 375.4679         | 1.900       |
| LPQNIPPL      | 46                    | [2]        | 891.0893         | 0.038       |
| GPPF          | 46.4 *                | [1]        | 416.4813         | -0.200      |
| VPL           | 47                    | [2]        | 327.424          | 2.133       |
| IPF           | 47.3                  | [3]        | 375.468          | 1.900       |
| TH            | 49                    | [2]        | 256.2614         | -1.950      |
| GPAE          | 49.6                  | [2]        | 372.3782         | -0.925      |
| LLAP          | 53.7                  | [2]        | 412.5343         | 1.950       |
| FPW           | 54.9                  | [3]        | 448.5218         | 0.100       |
| LPQ           | 56.7                  | [2]        | 356.4222         | -0.433      |
| LKPTPEGDLEIL  | 57                    | [2]        | 1324.549         | -0.233      |
| LPQYL         | 60.8 *                | [1]        | 632.7653         | 0.240       |
| FLQP          | 65.3                  | [2]        | 503.5987         | 0.375       |
| IPGDGPPGPPGP  | 65.4                  | [2]        | 1154.288         | -0.908      |
| WV            | 65.7                  | [2]        | 303.361          | 1.650       |
| APF           | 65.8                  | [3]        | 333.3873         | 1.000       |
| MPLW          | 67.3 *                | [1]        | 545.7032         | 0.800       |
| TQMVDEEIMEKFR | 68.8                  | [4]        | 1655.914         | -0.869      |
| NH            | 69                    | [2]        | 269.2603         | -3.350      |
| IPM           | 69.5                  | [5]        | 359.49           | 1.600       |
| QPG           | 70.9                  | [6]        | 300.3147         | -1.833      |
| QPF           | 71.7                  | [6]        | 390.4393         | -0.767      |
| VL            | 74                    | [2]        | 230.3073         | 4.000       |
| KPA           | 74.5                  | [3]        | 314.3849         | -1.233      |
| PFP           | 74.5 *                | [1]        | 359.4251         | -0.133      |

|                   |         |      |          |        |
|-------------------|---------|------|----------|--------|
| PQSVLS            | 74.5 *  | [1]  | 629.7112 | 0.217  |
| YVPEPF            | 74.5 *  | [1]  | 750.8493 | -0.167 |
| LPGERGRPGAPGP     | 76.8    | [2]  | 1260.419 | -1.146 |
| CAYQWQRPVDRIR     | 78      | [2]  | 1690.95  | -1.138 |
| SPQ               | 78.9    | [6]  | 330.3409 | -1.967 |
| QPQ               | 79.8    | [6]  | 371.3935 | -2.867 |
| GPVGPAGNPGANGLN   | 81.3    | [2]  | 1291.397 | -0.380 |
| GPVGXAGPPGK       | 83.3    | [2]  | 933.0833 | -0.536 |
| TW                | 84      | [2]  | 305.3336 | -0.800 |
| NLGIILR           | 86.3    | [4]  | 797.9966 | 1.171  |
| LPVP              | 87 *    | [1]  | 424.5463 | 1.200  |
| IA                | 88      | [2]  | 202.2535 | 3.150  |
| GPKGDRGLPGPPGRDGM | 89.6    | [2]  | 1663.889 | -1.353 |
| ML                | 91      | [2]  | 262.3733 | 2.850  |
| WA                | 92.6    | [2]  | 275.3073 | 0.450  |
| MM                | 93      | [2]  | 280.4124 | 1.900  |
| MPVQA             | 93.3    | [7]  | 544.6727 | 0.560  |
| GPVGPSPGXGK       | 93.7    | [2]  | 949.0833 | -0.773 |
| FA                | 94      | [2]  | 236.2706 | 2.300  |
| PACGGFWISGRPG     | 96.4    | [2]  | 1304.495 | 0.046  |
| EMPFK             | 97.6 *  | [1]  | 747.9135 | -0.983 |
| LPLP              | 101.0 * | [1]  | 438.5675 | 1.100  |
| SPGSSGPQGFTG      | 101.6   | [2]  | 1078.104 | -0.717 |
| LQAFEPLR          | 103.5   | [8]  | 973.1402 | -0.113 |
| LPIIDI            | 105.4   | [9]  | 682.8584 | 2.033  |
| IAVPTGVA          | 106     | [10] | 726.8783 | 1.725  |
| GPFPIIV           | 108.0 * | [1]  | 741.9373 | 1.771  |
| HPIK              | 108.0 * | [1]  | 493.6068 | -1.050 |
| LPYPY             | 108.3   | [2]  | 651.7683 | -0.400 |
| VPITPTL           | 110     | [2]  | 739.9104 | 1.129  |
| PGVGGPLGPIGPCYE   | 116.1   | [2]  | 1412.63  | 0.120  |
| APR               | 119.7   | [3]  | 342.3982 | -1.433 |
| APFPE             | 120 *   | [1]  | 559.6195 | -0.420 |
| APFPEVF           | 120 *   | [1]  | 805.9287 | 0.700  |
| WPW               | 120.1   | [3]  | 487.5585 | -1.133 |
| WQ                | 120.3   | [2]  | 332.3592 | -2.200 |
| YVPEPF            | 124.7   | [7]  | 750.8493 | -0.167 |
| VPITPT            | 130     | [2]  | 626.7509 | 0.683  |
| WPI               | 133     | [3]  | 414.5046 | 0.667  |
| WI                | 138.7   | [2]  | 317.388  | 1.800  |
| LAPSTM            | 140.8   | [11] | 618.7563 | 0.733  |
| WLAHKALCSEKLDQ    | 141     | [2]  | 1641.912 | -0.407 |
| IPAVFK            | 143     | [2]  | 673.8603 | 1.300  |
| HL                | 143.2   | [2]  | 268.3159 | 0.300  |
| PPGPTGPRGQPGNIGF  | 146.7   | [2]  | 1548.722 | -0.931 |
| WN                | 148.5   | [2]  | 318.3324 | -2.200 |
| MAGVDHI           | 153.4   | [2]  | 741.8665 | 0.757  |
| KL                | 159.8   | [12] | 259.3489 | -0.050 |
| WPF               | 159.8   | [3]  | 448.5218 | 0.100  |
| LPQNIPP           | 160     | [2]  | 777.9283 | -0.500 |

|               |       |      |          |        |
|---------------|-------|------|----------|--------|
| GPFILV        | 163.7 | [2]  | 741.9373 | 1.671  |
| LAHKALCSEKL   | 165   | [2]  | 1212.488 | 0.200  |
| TKCEVFRE      | 166   | [2]  | 1011.167 | -0.825 |
| VA            | 168.2 | [2]  | 188.2266 | 3.000  |
| FAGDDAPR      | 168.7 | [11] | 847.8829 | -0.888 |
| VAGTWY        | 174   | [2]  | 695.7729 | 0.450  |
| YPG           | 174   | [13] | 335.3599 | -1.100 |
| IPW           | 175.3 | [3]  | 414.5047 | 0.667  |
| LLQLEAIR      | 177.8 | [7]  | 955.1753 | 0.775  |
| LCSEKLDQ      | 186   | [2]  | 935.0733 | -0.638 |
| IPAVFKIDA     | 191   | [2]  | 973.1893 | 1.178  |
| LKALPMH       | 193   | [2]  | 809.0493 | 0.371  |
| YPYY          | 194.4 | [2]  | 604.6598 | -1.375 |
| LPQNIPPLT     | 205.2 | [5]  | 992.1953 | -0.044 |
| WSG           | 209.9 | [14] | 348.3587 | -0.700 |
| SPVVPF        | 214.1 | [7]  | 644.7686 | 1.200  |
| WWW           | 216   | [2]  | 576.6551 | -0.900 |
| VPGEIVE       | 224.5 | [5]  | 741.8396 | 0.557  |
| GPMGPXGVK     | 226.9 | [2]  | 839.0323 | -0.422 |
| LTFPGSAED     | 228   | [10] | 935.9862 | -0.233 |
| APGPAGP       | 229.1 | [9]  | 565.6269 | -0.286 |
| WIQP          | 237.3 | [2]  | 542.6355 | -0.375 |
| WM            | 243.1 | [2]  | 335.4271 | 0.500  |
| YPY           | 243.7 | [2]  | 441.4838 | -1.400 |
| GPAV          | 245.6 | [15] | 342.3953 | 1.000  |
| FPF           | 247   | [3]  | 409.4851 | 1.333  |
| FPGIPN        | 260   | [2]  | 740.8573 | -0.200 |
| ILDKVGINY     | 263   | [2]  | 1034.231 | 0.489  |
| FSD           | 275.1 | [14] | 367.3585 | -0.500 |
| WY            | 281   | [2]  | 367.4045 | -1.100 |
| WLAHKAL       | 286   | [2]  | 838.0205 | 0.457  |
| GPAGPpGVpGL # | 318.1 | [2]  | 918.0693 | 0.164  |
| TPEVDDEALEK   | 319.5 | [2]  | 1245.306 | -1.264 |
| LPLPL         | 325   | [2]  | 551.7271 | 1.640  |
| IQKVAGTW      | 329   | [2]  | 902.0615 | 0.138  |
| IVQNNDSTEYGLF | 337   | [2]  | 1499.597 | -0.415 |
| FL            | 339.6 | [2]  | 278.3513 | 3.300  |
| ILDKEGIDY     | 347.8 | [7]  | 1065.197 | -0.367 |
| WRE           | 350   | [2]  | 489.5316 | -2.967 |
| MHQPPQPL      | 350.4 | [2]  | 947.1262 | -1.163 |
| YPL           | 364.6 | [13] | 391.4673 | 0.300  |
| LPLPLL        | 371.5 | [5]  | 664.8865 | 2.000  |
| WRD           | 376   | [2]  | 475.5047 | -2.967 |
| VP            | 380.3 | [5]  | 214.2645 | 1.300  |
| PPL           | 390.1 | [2]  | 325.4081 | 0.200  |
| FAGDDAPRA     | 393.3 | [11] | 918.9617 | -0.589 |
| WRN           | 403   | [2]  | 474.52   | -2.967 |
| WRK           | 406   | [2]  | 488.5903 | -3.100 |
| IPSK          | 406.8 | [5]  | 443.5483 | -0.450 |
| IP            | 410   | [2]  | 228.2914 | 1.450  |

|              |        |      |          |        |
|--------------|--------|------|----------|--------|
| WRF          | 413    | [2]  | 507.5927 | -0.867 |
| WC           | 420    | [2]  | 307.3733 | 0.800  |
| VLVLDTDYK    | 424.4  | [2]  | 1065.232 | 0.344  |
| IPPL         | 428.9  | [5]  | 438.5733 | 1.275  |
| HPINHR       | 452.2  | [2]  | 772.8652 | -1.917 |
| LA           | 454    | [2]  | 202.2535 | 2.800  |
| IPPLTQT      | 465.1  | [5]  | 768.9173 | 0.029  |
| WRG          | 473    | [2]  | 417.4681 | -1.933 |
| WT           | 482.1  | [2]  | 305.3336 | -0.800 |
| WRS          | 483    | [2]  | 447.4943 | -2.067 |
| LKGYGGVSLPE  | 486    | [2]  | 1119.293 | -0.045 |
| WRW          | 487    | [2]  | 546.6294 | -2.100 |
| WRT          | 526    | [2]  | 461.5212 | -2.033 |
| FF           | 546.8  | [15] | 312.3684 | 2.800  |
| WW           | 554.8  | [2]  | 390.4418 | -0.900 |
| LPP          | 563.3  | [5]  | 325.4081 | 0.200  |
| WRR          | 570    | [2]  | 516.6037 | -3.300 |
| VLGP         | 580.4  | [2]  | 384.476  | 1.500  |
| WRY          | 640    | [2]  | 523.5921 | -2.233 |
| WS           | 643.5  | [2]  | 291.3067 | -0.850 |
| RP           | 657.2  | [5]  | 271.3195 | -3.050 |
| YP           | 658.1  | [2]  | 278.3078 | -1.450 |
| WRH          | 670    | [2]  | 497.5573 | -2.867 |
| YFPFGPIP     | 670    | [2]  | 1001.15  | -0.478 |
| WRM          | 673    | [2]  | 491.6147 | -1.167 |
| SPTVMFPPQSVL | 676.3  | [2]  | 1302.558 | 0.525  |
| WRA          | 690    | [2]  | 431.4949 | -1.200 |
| WRQ          | 720    | [2]  | 488.5469 | -2.967 |
| ILELA        | 721.1  | [7]  | 557.6933 | 2.080  |
| WRI          | 730    | [2]  | 473.5756 | -0.300 |
| YFPFGP       | 749.2  | [5]  | 676.7699 | -0.617 |
| WRP          | 780    | [2]  | 457.5328 | -2.333 |
| VR           | 826.1  | [2]  | 273.3354 | -0.150 |
| MP           | 870    | [2]  | 246.3304 | 0.150  |
| AL           | 882.1  | [2]  | 202.2534 | 2.800  |
| HP           | 902.8  | [5]  | 252.2731 | -2.400 |
| WRL          | 903    | [2]  | 473.5756 | -0.533 |
| RRDY         | 930    | [16] | 608.655  | -3.450 |
| LW           | 993.4  | [2]  | 317.388  | 1.450  |
| PGPIHNS      | 1000   | [2]  | 720.7833 | -0.943 |
| QPLPPT       | 1013.8 | [5]  | 651.7606 | -0.867 |
| KVEPLP       | 1071.9 | [17] | 681.8304 | -0.433 |
| LQP          | 1181.1 | [2]  | 356.4222 | -0.433 |
| RL           | 1200   | [16] | 287.3623 | -0.350 |
| IPPLTQTPV    | 1300   | [2]  | 965.1693 | 0.311  |
| TPVVVPP      | 1408.9 | [5]  | 707.8682 | 1.014  |
| PQNIPPL      | 1500   | [2]  | 777.919  | -0.500 |
| DPF          | 1540   | [16] | 377.3971 | -0.767 |
| GF           | 1547.1 | [18] | 222.2438 | 1.200  |
| GPGSPGGPL    | 1638.3 | [2]  | 737.8173 | -0.378 |

|           |        |      |          |        |
|-----------|--------|------|----------|--------|
| MW        | 1691.4 | [2]  | 335.4271 | 0.500  |
| QPHQPLPPT | 1754.8 | [5]  | 1014.149 | -1.500 |
| LR        | 2083.6 | [12] | 287.3623 | -0.350 |
| MGSF      | 2120   | [16] | 440.5206 | 0.875  |
| LP        | 2370   | [2]  | 228.2914 | 1.100  |
| TP        | 2370   | [2]  | 216.2369 | -1.150 |
| VPPFIQPE  | 2500   | [2]  | 926.0803 | -0.038 |
| SL        | 2517.1 | [2]  | 218.2529 | 1.500  |
| KP        | 2540   | [2]  | 243.3061 | -2.750 |
| GL        | 2615   | [2]  | 188.2267 | 1.700  |
| GPA       | 2870   | [16] | 243.2627 | -0.067 |
| PAL       | 2943.1 | [17] | 299.3702 | 1.333  |
| EK        | 3216.7 | [2]  | 275.3049 | -3.700 |
| FP        | 3630   | [2]  | 262.3085 | 0.600  |
| IHF       | 3770   | [16] | 415.4925 | 1.367  |
| KRIHF     | 4110   | [16] | 699.8543 | -0.860 |
| PP        | 4343.5 | [18] | 212.2486 | -1.600 |
| VC        | 5413.4 | [15] | 220.2926 | 3.350  |
| SP        | 5980   | [2]  | 202.2101 | -1.200 |
| KA        | 6270   | [2]  | 217.2682 | -1.050 |
| AAATP     | 6470   | [2]  | 429.4733 | 0.620  |
| AP        | 7950   | [2]  | 186.2106 | 0.100  |
| AAAAG     | 8130   | [2]  | 359.3824 | 1.360  |
| GGPAGPAV  | 8139.1 | [18] | 624.6948 | 0.425  |
| AA        | 9400   | [2]  | 160.1728 | 1.800  |
| GP        | 9690   | [2]  | 172.1839 | -1.000 |

\* Estimated based on their reported percent relative potency.

# p, hydroxyproline

## References

- Boots, J.W.P. Protein hydrolysate enriched in peptides inhibiting DPP-IV and their use. [United States Patent US 2009/0075904 A1](#).
- Lacroix, I.M.E.; Li-Chan, E.C.Y. Food-derived dipeptidyl-peptidase IV inhibitors as a potential approach for glycemic regulation—Current knowledge and future research considerations. *Trends Food Sci. Technol.* **2016**, *54*, 1–16.
- Nongonierma, A.B.; Dellafiora, L.; Paoella, S.; Galaverna, G.; Cozzini, P.; FitzGerald, R.J. In Silico Approaches Applied to the Study of Peptide Analogs of Ile-Pro-Ile in Relation to Their Dipeptidyl Peptidase IV Inhibitory Properties. *Front Endocrinol.* **2018**, *9*, 329.
- Song, J.J.; Wang, Q.; Du, M.; Ji, X.M.; Mao, X.Y. Identification of dipeptidyl peptidase-IV inhibitory peptides from mare whey protein hydrolysates. *J. Dairy Sci* **2017**, *100*, 6885–6894.
- Nongonierma, A.B.; FitzGerald, R.J. Structure activity relationship modelling of milk protein-derived peptides with dipeptidyl peptidase IV (DPP-IV) inhibitory activity. *Peptides* **2016**, *79*, 1–7.
- Taga, Y.; Hayashida, O.; Kusubata, M.; Ogawa-Goto, K.; Hattori, S. Production of a novel wheat gluten hydrolysate containing dipeptidyl peptidase-IV inhibitory tripeptides using ginger protease. *Biosci. Biotechnol. Biochem.* **2017**, *81*, 1823–1828.
- Nongonierma, A.B.; Paoella, S.; Mudgil, P.; Maqsood, S.; FitzGerald, R.J. Identification of novel dipeptidyl peptidase IV (DPP-IV) inhibitory peptides in camel milk protein hydrolysates. *Food Chem.* **2018**, *244*, 340–348.
- Wang, F.; Yu, G.; Zhang, Y.; Zhang, B.; Fan, J. Dipeptidyl Peptidase IV Inhibitory Peptides Derived from Oat (*Avena sativa* L.), Buckwheat (*Fagopyrum esculentum*), and Highland Barley (*Hordeum vulgare trifurcatum* (L.) Trofim) Proteins. *J. Agric. Food Chem.* **2015**, *63*, 9543–9549.

Commented [M1]: Please provide the website and accessed date (Date Month Year)

9. Zhang, Y.; Chen, R.; Chen, X.; Zeng, Z.; Ma, H.; Chen, S. Dipeptidyl Peptidase IV-Inhibitory Peptides Derived from Silver Carp (*Hypophthalmichthys molitrix* Val.) Proteins. *J. Agric. Food Chem.* **2016**, *64*, 831–839.
10. Lammi, C.; Zaroni, C.; Arnoldi, A.; Vistoli, G. Peptides Derived from Soy and Lupin Protein as Dipeptidyl-Peptidase IV Inhibitors: In Vitro Biochemical Screening and in Silico Molecular Modeling Study. *J. Agric. Food Chem.* **2016**, *64*, 9601–9606.
11. Liu, R.; Zhou, L.; Zhang, Y.; Sheng, N.J.; Wang, Z.K.; Wu, T.Z.; Wang, X.Z.; Wu, H. Rapid Identification of Dipeptidyl Peptidase-IV (DPP-IV) Inhibitory Peptides from *Ruditapes philippinarum* Hydrolysate. *Molecules* **2017**, *22*.
12. Sato, K.; Miyasaka, S.; Tsuji, A.; Tachi, H. Isolation and characterization of peptides with dipeptidyl peptidase IV (DPP-IV) inhibitory activity from natto using DPP-IV from *Aspergillus oryzae*. *Food Chem.* **2018**, *261*, 51–56.
13. Ibrahim, M.A.; Serem, J.C.; Bester, M.J.; Neitz, A.W.; Gaspar, A.R.M. Multiple antidiabetic effects of three alpha-glucosidase inhibitory peptides, PFP, YPL and YPG: Dipeptidyl peptidase-IV inhibition, suppression of lipid accumulation in differentiated 3T3-L1 adipocytes and scavenging activity on methylglyoxal. *Int. J. Biol. Macromol.* **2018**, *122*, 104–114.
14. Sila, A.; Alvarez, O.M.; Haddar, A.; Frikha, F.; Dhulster, P.; Nedjar-Arroume, N.; Bougatef, A. Purification, identification and structural modelling of DPP-IV inhibiting peptides from barbel protein hydrolysate. *J. Chromatogr. B Analyt. Technol. Biomed. Life Sci.* **2016**, *1008*, 260–269.
15. Neves, A.C.; Hamedy, P.A.; O'Keefe, M.B.; FitzGerald, R.J. Bioactive peptides from Atlantic salmon (*Salmo salar*) with angiotensin converting enzyme and dipeptidyl peptidase IV inhibitory, and antioxidant activities. *Food Chem.* **2017**, *218*, 396–405.
16. Lin, Y.S.; Han, C.H.; Lin, S.Y.; Hou, W.C. Synthesized Peptides from Yam Dioscorin Hydrolysis in Silico Exhibit Dipeptidyl Peptidase-IV Inhibitory Activities and Oral Glucose Tolerance Improvements in Normal Mice. *J. Agric. Food Chem.* **2016**, *64*, 6451–6458.
17. Ji, W.; Zhang, C.; Ji, H. Two Novel Bioactive Peptides from Antarctic Krill with Dual Angiotensin Converting Enzyme and Dipeptidyl Peptidase IV Inhibitory Activities. *J. Food Sci.* **2017**, *82*, 1742–1749.
18. Neves, A.C.; Hamedy, P.A.; O'Keefe, M.B.; Alashi, M.A.; Aluko, R.E.; FitzGerald, R.J. Peptide identification in a salmon gelatin hydrolysate with antihypertensive, dipeptidyl peptidase IV inhibitory and antioxidant activities. *Food Res. Int.* **2017**, *100*, 112–120.
